# Supplementary material for: Thermal Deformation Behavior and Consitutive Equation of Uranium-50wt.%Zirconium Nuclear Fuel
Source: Preprints.org preprint supplement (doi:10.20944/preprints202409.2394.v1), 2024-09-30
Supplement: Supplementary file 1 [file supplementary]

# China Nuclear North Nuclear Fuel Components Co., Ltd. publishes and submits the approval form for external review

| Submitting department (unit) | Metallurgical Research Institute | Undertaker | Li Yanfeng |
| --- | --- | --- | --- |
| Material name | Thermal deformation behavior and constitutive equation of U-50wt%Zr metal-type fuel | Receiving unit | Materials |
| Confidentiality level | Confidential £ Secret £ Internal £ Non-confidential £ General Business Secret £ Core Business Secret | | |
| Material form | R Text, R Audio and Video, R Image, R Chart, R Data  Quantity of materials: 6891 words, 13 images, 1 table | | |
| Carrier form | Paper media, magnetic media, optical disc, confidential document, and other  Others: Electronic documents | | |
| purpose | £Publishing books £Publishing papers £Technological exchanges £Evaluation and selection £Reporting to higher-level units £Reporting to local governments ROther  Others: Publication of scientific papers | | |
| Upload attachments | Attachment: 2024.04.15 Thermal deformation behavior and constitutive equation of U-50wt%Zr metal-type fuel.docx | | |
| Submitting department (unit)  Self review opinions | R contains no confidential or sensitive information and agrees to its publication. Some content is not suitable for public disclosure and disagrees to its publication.  Agree to proceed  Signature: Liu Wei April 16, 2024 | | |
| Confidentiality classification by business supervisor  Opinions of the responsible person | R contains no confidential or sensitive information and agrees to its publication. However, some parts of the content are not suitable for public disclosure and do not agree to its publication.  Agree to proceed  Signature: Cai Zhenfang April 17, 2024 | | |
| Opinions of the Confidentiality Department | R contains no confidential or sensitive information and agrees to its publication. Some parts of the content are not suitable for public disclosure and do not agree to its publication.  Agree to proceed  Signature: Yan Mou, April 17, 2024 | | |
| Party and Mass Work Department/  Opinions of the Propaganda Department | R agrees £ disagrees  Approved  Signature: Liang Ailan April 17, 2024 | | |
